# Supplementary material
Source: publisher figshare collection journal article supplement (https://springernature.figshare.com/ndownloader/files/11773361)
Supplement: Supplementary file [file 11773361]

### APPENDIX C

#### FIGURES FROM SIMULATION STUDY

Figures 1, 2, and 3 show simulation results from simulated data with low, medium, and high signal strength, respectively. Each curve is the mean of AUCs over 25 simulations, and the black vertical lines show plus/minus one standard deviation of the mean.

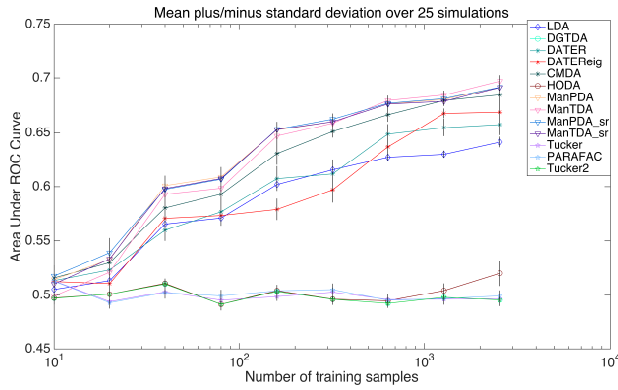

Figure 1. AUCs obtained by the tensor decomposition methods when low signal strength is simulated.

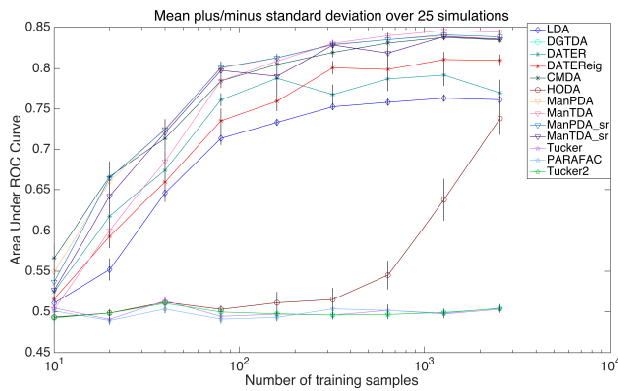

Figure 2. AUCs obtained by the tensor decomposition methods when medium signal strength is simulated.

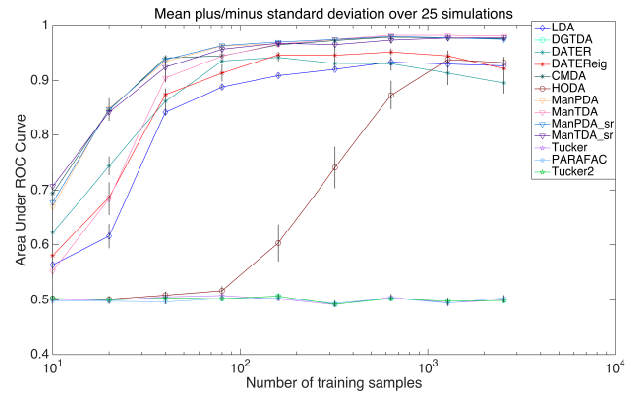

Figure 3. AUCs obtained by the tensor decomposition methods when high signal strength is simulated.
